# Supplementary material for: Interthalamic adhesion size in aging dogs with presumptive spontaneous brain microhemorrhages: a comparative retrospective MRI study of dogs with and without evidence of canine cognitive dysfunction
Source: PeerJ. 2020 Apr 13;8:e9012. doi: 10.7717/peerj.9012 (PMC7161569; doi:10.7717/peerj.9012)
Supplement: Supplemental Information 1 [file peerj-08-9012-s001.xlsx]

## Sheet: Data
name	Status 0=control 1=CCD 2=noCCD	BW	Breed	Age	hemorrhage	total brain vol	TBV^0.3	TBV^0.67	TBV/BW	right brain	left brain	diff R vs L	% difference R vs L	Hippocampus	Hippo/TBV*1000	Right Hippo	Left Left Hippo	diff R vs L Hippo	% difference Hippo	adhesion Sag	Sag ht to TBV*1000	Sag ht to TBV0.3	sag ht/BW	Sag ht/nTBV	Axial adhesion area	Area to TBV	Sag ht to TBV0.67*1000	Area to BW	Area to nTBV*10		Adhesion diameter			Adhesion perimeter
1	Control	4.63		9	0	54779.2	37.9647	1442.37	118.313	27199.9	27579.2	-379.31	-1.39453	385.24	7.0326	193.97	191.27	2.7	1.39197	7.11	12.9794	18.7279	15.3564	0.600946	44.357	8.09742	30.7528	9.58035	3.74911		7.515	13.7187	0.521017	7.704	14.0637	20.2925
2	Control	4.5		9	0	61151.5	39.3831	1552.17	135.892	30575.8	30575.8	-0.01	-3.27057e-05	728.59	11.9145	341.67	386.92	-45.25	-13.2438	6.24	10.2042	15.8444	13.8667	0.459187	39.988	6.53917	25.7627	8.88622	2.94263		7.135	11.6677	0.45968	7.198	11.7708	18.2769
3	Control	7	maltese	9	0	47044	36.0866	1303.18	67.2057	24504	22540	1964	8.01502	138.68	2.94788	62.48	76.2	-13.72	-21.959	6.35	13.498	17.5966	9.07143	0.94486	36.41	7.73956	27.9394	5.20143	5.41769		6.809	14.4737	0.522493	7.18	15.2623	19.8966
4	Control	5.9		9	0	47358.8	36.1669	1308.98	80.2691	23467.4	23891.4	-423.99	-1.80672	357.64	7.55171	180.93	176.71	4.22	2.33239	6.49	13.7039	17.9446	11	0.80853	36.426	7.6915	27.8277	6.1739	4.53798		6.81	14.3796	0.520251	6.879	14.5253	19.0202
5	Control	12.4	Boston	10	0	75549	42.2585	1787.12	60.9266	37704.1	37844.9	-140.86	-0.373594	287.05	3.79952	158.5	128.55	29.95	18.8959	7.1	9.39787	16.8014	5.72581	1.16534	48.413	6.40816	27.09	3.90427	7.94612		7.851	10.3919	0.439311	8.088	10.7056	19.1394
6	Control	20	mixed	10	0	71241	41.4395	1718.52	35.6205	36046.2	35194.8	851.48	2.36219	578.07	8.11429	295.95	282.12	13.83	4.67309	7.6	10.668	18.34	3.8	2.1336	55.805	7.83327	32.4728	2.79025	15.6665		8.429	11.8317	0.490481	8.68	12.184	20.9462
7	Control	24	mixed	10	0	71784	41.5445	1727.24	29.91	36023.6	35760.4	263.2	0.730632	457.76	6.37691	235.51	222.25	13.26	5.63033	7.38	10.2808	17.7641	3.075	2.4674	43.862	6.11028	25.3943	1.82758	14.6647		7.473	10.4104	0.432656	7.52	10.4759	18.1011
8	Control	29	mixed	10	0	80015	43.0752	1856.87	27.5914	40450.8	39564.2	886.68	2.19199	441.31	5.51534	218.2	223.11	-4.91	-2.25023	7.44	9.29826	17.2721	2.56552	2.69649	54.188	6.77223	29.1825	1.86855	19.6395		8.306	10.3806	0.447312	8.491	10.6118	19.7121
9	Control	20	mixed	10	0	69783	41.1549	1694.99	34.8915	35180.5	34602.5	578.02	1.64301	566.58	8.11917	319.14	247.44	71.7	22.4666	7.47	10.7046	18.1509	3.735	2.14092	46.032	6.59645	27.1577	2.3016	13.1929		7.656	10.9712	0.451685	7.843	11.2391	19.0573
10	Control	22	mixed	10	0	75314	42.2146	1783.41	34.2336	37736	37578	158.04	0.418804	592.5	7.86706	313.95	278.55	35.4	11.2757	7.95	10.5558	18.8323	3.61364	2.32228	51.943	6.89686	29.1257	2.36105	15.1731		8.132	10.7975	0.455981	8.195	10.8811	19.4127
11	Control	29	mixed	10	0	70072	41.2116	1699.66	24.1628	35215.5	34856.5	358.98	1.01938	474.69	6.77432	233.48	241.21	-7.73	-3.31078	7.98	11.3883	19.3635	2.75172	3.3026	53.541	7.64086	31.5009	1.84624	22.1585		8.257	11.7836	0.485802	8.354	11.922	20.271
12	Control	5.22		11	0	48435.5	36.4389	1328.75	92.7884	23995.5	24440	-444.48	-1.85235	573.74	11.8454	262.04	311.7	-49.66	-18.9513	6.76	13.9567	18.5516	12.9502	0.72854	36.028	7.43834	27.1142	6.90192	3.88281		6.773	13.9835	0.509728	6.858	14.159	18.8206
13	Control	33.1	coonhound	11	0	91784.3	45.0911	2034.76	27.7294	44855.2	46929.1	-2073.92	-4.62359	814.09	8.8696	419.4	394.69	24.71	5.89175	7.47	8.13865	16.5665	2.2568	2.69389	59.45	6.47714	29.2173	1.79607	21.4393		8.7	9.47875	0.42757	8.992	9.79688	19.9419
14	Control	36.3	Golden retriever	11	0	97688.6	46.0378	2121.11	26.9115	47970.8	49717.8	-1747	-3.6418	530.68	5.43236	193.32	337.36	-144.04	-74.5086	7.69	7.87195	16.7036	2.11846	2.85752	60.481	6.1912	28.5139	1.66614	22.4741		8.775	8.98262	0.413699	9.035	9.24877	19.6252
15	Control	4.68		11	0	51466.6	37.1836	1383.62	109.971	25392.5	26074.1	-681.61	-2.6843	536.29	10.4202	266.3	269.99	-3.69	-1.38566	5.26	10.2202	14.146	11.2393	0.478306	34.263	6.65733	24.7633	7.32115	3.11563		6.605	12.8336	0.477371	6.77	13.1542	18.2069
16	Control	20	mixed	11	0	62730	39.719	1578.76	31.365	31610	31120	490.06	1.55033	828.05	13.2002	404.28	423.77	-19.49	-4.82092	3.66	5.83453	9.21473	1.83	1.16691	38.488	6.1355	24.3786	1.9244	12.271		7	11.1589	0.443385	7.133	11.371	17.9587
17	Control	21	mixed	11	2	67267	40.6543	1654	32.0319	33837.7	33429.3	408.3	1.20664	460.09	6.83976	234.9	225.19	9.71	4.13367	6.41	9.52919	15.7671	3.05238	2.00113	49.922	7.42147	30.1826	2.37724	15.5851		7.973	11.8528	0.482044	8.148	12.1129	20.0422
18	Control	31	mixed	11	1	81682	43.3722	1882.57	26.349	41540.9	40141.1	1399.88	3.36988	775.98	9.50001	450.29	325.69	124.6	27.6711	3.59	4.39509	8.27719	1.15806	1.36248	44.999	5.50905	23.903	1.45158	17.078		7.569	9.26642	0.402057	7.698	9.42435	17.7487
19	Control	22	mixed	11	0	77779	42.6702	1822.11	35.3541	39366.4	38412.6	953.72	2.42268	610.76	7.85251	320.95	289.81	31.14	9.70245	8.26	10.6198	19.3578	3.75455	2.33636	58.672	7.54342	32.2	2.66691	16.5955		8.643	11.1123	0.47434	8.805	11.3205	20.635
20	Control	5.7	westie	12	0	54271.5	37.8471	1433.45	95.2132	26377.5	38413.6	-12036.1	-45.6302	478.53	8.81733	179.33	299.2	-119.87	-66.8432	5.71	10.5212	15.087	10.0175	0.599707	31.742	5.84874	22.1438	5.56877	3.33378		6.357	11.7133	0.443477	6.409	11.8091	16.9339
21	Control	4.15	havanese	12	0	48519.4	36.4599	1330.28	116.914	23810.5	24708.9	-898.44	-3.7733	716.02	14.7574	370.17	345.85	24.32	6.56995	6.24	12.8608	17.1147	15.0361	0.533725	33.429	6.88982	25.1293	8.05518	2.85928		6.524	13.4462	0.490422	6.594	13.5904	18.0856
22	Control	11.5	Beagle	13	0	72016	41.5893	1730.96	62.6226	35491.2	36524.8	-1033.67	-2.91247	806.74	11.2022	407.39	399.35	8.04	1.97354	6.06	8.41479	14.5711	5.26957	0.967701	46.413	6.44482	26.8135	4.03591	7.41154		7.687	10.674	0.44409	7.847	10.8962	18.8679
23	Control	6		13	1	57586.9	38.6025	1491.25	95.9782	28269.7	29317.2	-1047.43	-3.70513	381.14	6.61852	184.41	196.73	-12.32	-6.68077	6.15	10.6795	15.9316	10.25	0.640771	36.269	6.29813	24.3213	6.04483	3.77888		6.79	11.7909	0.455324	6.87	11.9298	17.7968
24	Control	5	chihuahua	13	0	54133.4	37.815	1431.01	108.267	26020.9	28112.5	-2091.55	-8.03795	293.4	5.41994	140.25	153.15	-12.9	-9.19786	5.13	9.47658	13.566	10.26	0.473829	31.802	5.87474	22.2234	6.3604	2.93737		6.363	11.7543	0.44465	6.553	12.1053	17.3291
25	Control	17	mixed breed	14	0	65624.9	40.3208	1626.97	38.6029	32310.4	33314.5	-1004.09	-3.10764	477.9	7.28229	230.57	247.33	-16.76	-7.26894	3.54	5.39429	8.77959	2.08235	0.91703	36.708	5.59361	22.5622	2.15929	9.50913		6.837	10.4183	0.420229	7.032	10.7154	17.4401
1	CCD	6.1	chihuahua	10	2	43056	35.0367	1228.45	70.5836	21919.5	21136.5	783	3.57216	314.31	7.30003	148.85	165.46	-16.61	-11.1589	3.08	7.15347	8.79078	5.04918	0.436362	12.294	2.85535	10.0078	2.01541	1.74176		3.956	9.18803	0.322033	4.465	10.3702	12.7438
2	CCD	29	springer spaniel	11	0	71707	41.5297	1726	24.7266	36289.6	35417.4	872.12	2.40323	532.21	7.42201	299.99	232.22	67.77	22.5908	3.8	5.29934	9.15008	1.31034	1.53681	15.69	2.18807	9.09037	0.541034	6.34541		4.47	6.2337	0.25898	4.701	6.55585	11.3196
3	CCD	5.7	miniature poodle	11	12	51283	37.1393	1380.33	89.9702	26247.5	25035.5	1212.1	4.61795	135.4	2.64025	133.74	1.66	132.08	98.7588	3.24	6.31788	8.7239	5.68421	0.360119	10.973	2.1397	7.94956	1.92509	1.21963		3.738	7.28897	0.270805	4.075	7.9461	10.9722
4	CCD	11.5	Wheaten terrier	12	0	67222.8	40.6454	1653.27	58.4546	32573.2	34649.7	-2076.54	-6.37501	641.35	9.54066	294.7	2.66	292.04	99.0974	4.07	6.05449	10.0134	3.53913	0.696266	25.631	3.81284	15.5032	2.22878	4.38477		5.713	8.4986	0.345557	6.087	9.05496	14.9759
5	CCD	23	springer spaniel	13	2	93213	45.3238	2055.82	40.5274	47654.7	45558.3	2096.34	4.39902	723.1	7.7575	393.36	329.74	63.62	16.1735	5.86	6.28668	12.9292	2.54783	1.44594	33.241	3.56613	16.1692	1.44526	8.20211		6.506	6.97971	0.316468	6.573	7.05159	14.5023
6	CCD	36	Labrador	13	3	75827	42.3102	1791.5	21.0631	38771.9	37055.1	1716.86	4.4281	422.79	5.57572	197.33	225.46	-28.13	-14.2553	4.74	6.25107	11.203	1.31667	2.25039	56.602	7.46462	31.5948	1.57228	26.8726		8.489	11.1952	0.47385	8.731	11.5144	20.6357
7	CCD	7.5	tibetan terrier	13	3	51955	37.3008	1392.36	69.2733	26825.6	25129.4	1696.18	6.32299	225.46	4.33952	130.12	95.34	34.78	26.7292	5.54	10.6631	14.8522	7.38667	0.799731	25.522	4.91233	18.33	3.40293	3.68425		5.701	10.973	0.409449	5.771	11.1077	15.4715
8	CCD	8.7	shih tzu	13	1	56700.9	38.4036	1475.91	65.1734	27450	29250.9	-1800.97	-6.56092	371.3	6.5484	206.69	164.61	42.08	20.359	4.22	7.44256	10.9886	4.85057	0.647503	24.081	4.24702	16.316	2.76793	3.69491		5.537	9.76528	0.375158	5.82	10.2644	15.1548
9	CCD	17	Samoyed	14	2	71691	41.5266	1725.74	42.1712	36705.7	34985.3	1720.48	4.68722	315.07	4.39483	179.42	135.65	43.77	24.3953	4.33	6.03981	10.4271	2.54706	1.02677	17.175	2.3957	9.95222	1.01029	4.07269		4.676	6.52244	0.270955	4.982	6.94927	11.9971
10	CCD	7.4	Miniature schnauzer	14	2	56687.2	38.4005	1475.67	76.6043	27930.6	28756.6	-825.99	-2.95729	294.35	5.19253	141.68	152.67	-10.99	-7.75692	4.72	8.3264	12.2915	6.37838	0.616153	32.549	5.74186	22.0571	4.39851	4.24898		6.438	11.3571	0.436276	6.614	11.6675	17.2237
11	CCD	13	cockapoo	14	7	48051	36.3422	1321.71	36.9623	24407.1	23643.9	763.22	3.12704	350.46	7.2935	175.39	175.07	0.32	0.182451	2.67	5.5566	7.34683	2.05385	0.722357	27.436	5.70977	20.758	2.11046	7.4227		5.91	12.2994	0.447149	6.063	12.6178	16.6831
12	CCD	11.6	German Shepherd	15	0	57198.3	38.5155	1484.53	49.3089	27400.1	29798.3	-2398.21	-8.75257	313.02	5.47254	96.13	176.07	-79.94	-83.1582	1.96	3.42667	5.08886	1.68966	0.397494	13.989	2.4457	9.42318	1.20595	2.83701		4.22	7.37784	0.284265	4.633	8.09988	12.0289
13	CCD	14	mixed	15	18	58136	38.7248	1500.71	41.5257	29706	28430	1276.08	4.29569	460.29	7.91747	256.96	203.33	53.63	20.871	1.41	2.42535	3.64107	1.00714	0.339549	17.77	3.05663	11.8411	1.26929	4.27928		4.757	8.18254	0.316983	5.156	8.86886	13.3145
14	CCD	10	shetland sheepdog	15	41	49635	36.7372	1350.6	49.635	25372.6	24262.4	1110.22	4.37566	291.26	5.86804	158.61	132.65	25.96	16.3672	1.98	3.98912	5.38963	1.98	0.398912	19.975	4.02438	14.7898	1.9975	4.02438		5.043	10.1602	0.373391	5.182	10.4402	14.1056
15	CCD	5.4	shih tzu	16	12	45833	35.7743	1280.71	84.8759	23327.9	22505.1	822.84	3.52728	259.98	5.67233	100.09	159.89	-59.8	-59.7462	5.78	12.611	16.1569	10.7037	0.680994	31.668	6.90943	24.7268	5.86444	3.73109		6.35	13.8546	0.495817	6.88	15.011	19.2317
1	SBM	4	chihuahua	10	11	47955	36.318	1319.95	119.888	24663.7	23291.3	1372.42	5.56453	422.79	8.81639	182.39	240.4	-58.01	-31.8055	5.19	10.8226	14.2904	12.975	0.432906	24.38	5.08393	18.4705	6.095	2.03357		5.572	11.6192	0.422139	5.768	12.0279	15.8819
2	SBM	5.5	maltese	11	4	48964	36.5709	1338.4	89.0255	24889.7	24074.3	815.3	3.27566	389.77	7.96034	206.71	183.06	23.65	11.4411	4.6	9.39466	12.5783	8.36364	0.516706	23.869	4.87481	17.834	4.33982	2.68114		5.513	11.2593	0.411911	5.638	11.5146	15.4166
3	SBM	6.8	shih tzu	12	8	43409	35.1322	1235.15	63.8368	22426.5	20982.5	1443.9	6.43838	442.68	10.1979	266.3	176.38	89.92	33.7664	5.48	12.6241	15.5982	8.05882	0.858439	33.862	7.80069	27.4153	4.97971	5.30447		6.566	15.1259	0.531595	6.7	15.4346	19.0708
4	SBM	10.7	mixed	12	50	61780	39.5175	1562.78	57.7383	31497.9	30282.1	1215.82	3.86	532.78	8.62383	282.43	250.35	32.08	11.3586	6.3	10.1975	15.9423	5.88785	1.09113	32.872	5.32082	21.0343	3.07215	5.69327		6.469	10.471	0.413941	6.559	10.6167	16.5977
5	SBM	7	bichon frise	12	10	52675	37.4723	1405.19	75.25	26788.5	25886.5	901.9	3.36675	396.52	7.52767	205.05	191.47	13.58	6.62277	4.94	9.37826	13.1831	7.05714	0.656478	37.35	7.09065	26.5799	5.33571	4.96346		6.896	13.0916	0.49075	7.042	13.3688	18.7925
6	SBM	9.1	Boston	13	5	72544	41.6906	1739.41	79.7187	36917.6	35626.4	1291.28	3.49773	346.58	4.77751	157.81	188.77	-30.96	-19.6185	6.68	9.2082	16.0228	7.34066	0.837947	41.245	5.68551	23.7121	4.53242	5.17382		7.247	9.9898	0.416636	7.418	10.2255	17.793
7	SBM	23	Mixed breed	13	70	80489.2	43.1601	1864.2	34.9953	40976.5	39512.8	1463.72	3.5721	658.47	8.18085	339.39	319.08	20.31	5.98427	4.96	6.16232	11.4921	2.15652	1.41733	28.961	3.59812	15.5354	1.25917	8.27568		6.072	7.54387	0.325717	6.272	7.79235	14.5319
8	SBM	30.7	golden retriever	13	7	76743	42.4799	1805.9	24.9977	39727.6	37015.4	2712.12	6.8268	521.06	6.78967	270.84	250.22	20.62	7.61335	2.82	3.6746	6.63843	0.918567	1.1281	32.392	4.22084	17.9368	1.05511	12.958		6.422	8.36819	0.355613	6.638	8.64965	15.6262
9	SBM	36	Labrador	14	4	73093.3	41.7956	1748.18	20.3037	34697.4	38395.9	-3698.54	-10.6594							3.82	5.2262	9.13972	1.06111	1.88143	32.969	4.51054	18.8591	0.915806	16.2379		6.479			6.738
10	SBM	13.6	pug	14	26	64870	40.1656	1614.47	47.6985	32548.9	32321.1	227.74	0.699686	620.8	9.56991	314.06	306.74	7.32	2.33076	5.53	8.52474	13.768	4.06618	1.15936	29.625	4.56683	18.3497	2.17831	6.21088		6.142	9.46817	0.380435	6.371	9.82118	15.8618
11	SBM	38	greyhound	14	5	87045	44.3013	1964.1	22.9066	44102.1	42942.9	1159.2	2.62845	434.31	4.98949	264.7	169.61	95.09	35.9237	6.58	7.55931	14.8528	1.73158	2.87254	44.817	5.14872	22.8181	1.17939	19.5651		7.554	8.67827	0.384604	8.195	9.41467	18.4983
12	SBM	16.5	shetland sheepdog	19	20	52885	37.5221	1408.93	32.0515	27103.8	25781.2	1322.7	4.88012	177.81	3.3622	91.8	86.01	5.79	6.30719	5.09	9.62466	13.5654	3.08485	1.58807	36.606	6.92181	25.9815	2.21855	11.421		6.827	12.9091	0.484553	6.894	13.0358	18.3732
	0		cont	11
	0		SBM	13
	0		CCD	13

## Sheet: Sheet2
	Axial adhesion area/TBV					Axial Adhesion Area			Adhesion height				Adhesion height/TBV
	Control	CCD	SBM		Control	No CCD	CCD		Control	No CCD	CCD		Control	CCD	SBM									sag ht/BW	Sag ht/nTBV		Control	CCD	SBM
	8.09742	2.85535	5.08393		44.357	29.625	33.241		7.11	5.53	5.86		12.9794	7.15347	10.8226						1	19.3635		23.3077	3.3026		0	2	11
	6.53917	2.18807	4.87481		36.269	41.245	17.175		6.15	6.68	4.33		10.2042	5.29934	9.39466						2	19.3578		15.2286	2.87254		0	0	4
	7.73956	2.1397	7.80069		36.028	15.374	32.549		6.76	3.03	4.72		13.498	6.31788	12.6241						3	18.8323		12.975	2.69649		0	12	8
	7.6915	3.81284	5.32082		48.413	33.862	56.602		7.1	5.48	4.74		13.7039	6.05449	10.1975						4	18.34		10.7037	2.4674		0	0	50
	6.40816	3.56613	7.09065		34.263	32.872	27.436		5.26	6.3	2.67		9.39787	6.28668	9.37826						5	18.1509		9.07143	2.33636		0	2	10
	7.83327	7.46462	5.68551		39.988	24.38	15.69		6.24	5.19	3.8		10.668	6.25107	9.2082						6	17.7641		8.36364	2.32228		0	3	5
	6.11028	4.91233	3.59812		40.126	37.35	17.77		4.44	4.94	1.41		10.2808	10.6631	6.16232						7	17.5966		8.05882	2.25039		0	3	70
	6.77223	4.24702	4.22084		55.805	32.392	25.522		7.6	2.82	5.54		9.29826	7.44256	3.6746						8	17.2721		7.57812	2.14092		0	1	7
	6.59645	2.3957	4.51054		38.488	32.266	10.973		3.66	4.17	3.24		10.7046	6.03981	5.2262						9	16.8014		7.38667	2.1336		0	2	4
	6.89686	5.74186	4.56683		43.862	23.869	12.294		7.38	4.6	3.08		10.5558	8.3264	8.52474						10	16.1569		7.34066	2.00113		0	2	26
	7.64086	5.70977	5.14872		49.922	23.328	19.975		6.41	4.85	1.98		11.3883	5.5566	7.55931						11	16.0228		7.05714	1.58807		0	7	5
	7.43834	2.4457	6.92181		54.188	44.817	31.668		7.44	6.58	5.78		13.9567	3.42667	9.62466						12	15.9423		5.88785	1.53681		0	0	20
	6.47714	3.05663			46.032	36.606	24.081		7.47	5.09	4.22		8.13865	2.42535							13	15.7671		5.72581	1.44594		0	18
	6.1912	4.02438			44.999	28.961			3.59	4.96			7.87195	3.98912							14	15.5982		5.68421	1.36248		0	41
	6.65733	6.90943			51.943				7.95				10.2202	12.611							15	14.8528		5.04918	1.16691		0	12
	6.1355				53.541				7.98				5.83453								16	14.8522		4.06618	1.16534		0
	7.42147				58.672				8.26				9.52919								17	14.2904		3.8	1.15936		2
	5.50905				36.41				6.35				4.39509								18	13.9754		3.75455	1.1281		1
	7.54342				36.426				6.49				10.6198								19	13.8999		3.735	1.09113		0
	5.84874												10.5212								20	13.768		3.61364	1.02677		0
	6.88982												12.8608								21	13.5653		3.08485	0.982369		0
	6.44482												8.41479								22	13.183		3.075	0.94486		0
	6.29813												10.6795								23	12.9292		3.05238	0.858439		1
	5.87474					Age							9.47658								24	12.5783		2.75172	0.837947		0
	5.59361				Control	No CCD	CCD						5.39429								25	11.203		2.56552	0.799731		0
	Control	No CCD	CCD		9	14	13														26	10.4271		2.54783	0.729924
	4.63	13.6	23		13	13	14														27	9.72392		2.54706	0.722357
	6	9.1	17		11	8	14														28	9.21471		2.24194	0.680994
	5.22	1.3	7.4		10	12	13														29	9.1501		2.05385	0.656478
	12.4	6.8	36		11	12	14														30	8.79078		1.98	0.516706
	4.68	10.7	13		9	10	11														31	8.72392		1.83	0.436362
	4.5	4	29		8	12	15														32	8.2772		1.73158	0.432906
	6.63	7	14		10	13	13														33	8.03559		1.31667	0.398912
	20	30.7	7.5		11	14	11														34	7.34681		1.31034	0.360119
	20	18.6	5.7		10	11	10														35	6.63845		1.15806	0.339549
	24	5.5	6.1		11	13	15														36	5.38963		1.00714	0.33592
	21	6.4	10		10	14	16														37	3.64108		0.918567	0.0733902
	29	38	5.4		10	19	13
	20	16.5	8.7		11	13
	31	23			10																1	3.3
	22				10																2	2.87254
	29				11																3	2.69649
	22				9																4	2.4674
	7				9																5	2.3
	5.9																				6	2.3
																					7	2.25039
																					8	2.1336
																					9	2.1
			hemorrhage																		10	2.00113
																					11	1.58807
		Control	No CCD	CCD																	12	1.53681
		0	26	2																	13	1.44594
		1	5	2																	14	1.4
		0	1	2																	15	1.16691
		0	8	3																	16	1.16534
		0	50	7																	17	1.15936
		0	11	0																	18	1.1281
		0	10	18																	19	1.09113
		0	7	3																	20	1.02677
		0	19	12																	21	0.982369
		0	4	2																	22	0.9
		2	6	41																	23	0.858439
		0	5	12																	24	0.837947
		0	20	1																	25	0.8
		1	70																		26	0.799731
		0																			27	0.729924
		0																			28	0.72854
		0																			29	0.722357
		0																			30	0.7
		0																			31	0.656478
																					32	0.640771
																					33	0.616153
																					34	0.600946
																					35	0.6
																					36	0.516706
																					37	0.478306
																					38	0.461764
																					39	0.459187
																					40	0.436362
																					41	0.432906
																					42	0.398912
																					43	0.360119
																					44	0.339549
																					45	0.0733902

## Sheet: Removed cases
Intercranial hemmorage
	BW	Breed	Age
name				total brain vol	right brain	left brain	Hippocampus	Right Hippo	Left Left Hippo	adhesion Sag	Axial adhesion area	Axuial diamater area	Axial diameter perimeter
				61401.2	31754.1	29647.1	921.15	486.12	435.03	3.44	17.655	4.741	4.909
				51084.7	26158.7	24926	343.04	166.66	176.38	4.63	26.592	5.819	5.961
				70825.2	36444.3	34380.9	775.68	397.21	378.47	5.68	64.089	9.033	9.331
					0
				42699.2	21524.5	21174.7	235.42	125.52	109.9	4.03	12.559	3.99	4.231
					39886	34.1549	1167.38	20954.5	18931.5	2022.94	9.65397	111.86	2.80449	58.54	53.32	5.22	8.91698	5.32	13.338	15.5761	23.758	5.95647	2.03515	5.5	13.7893	0.471139	5.61	14.0651	16.4251
					59488.1	39.0227	1523.89	30624.8	28863.3	1761.53	5.75197	298.9	5.02453	110.4	188.5	-78.1	-70.7428	6.32	10.624	16.1957	34.2	5.74905	2.24426	6.6	11.0947	0.433102	6.695	11.2543	17.1567
				55534	38.1383	1455.59	#REF!	28516	27018	1497.9	5.25285	469.83	8.46022	205.99	263.84	-57.85	-28.0839	5.33	9.59772	13.9754	#REF!	#REF!	33.891	6.10275	2.32833	6.569	11.8288	0.451294	6.82	12.2808	17.8823
	Status 0=control 1=CCD 2=noCCD	BW	Breed	Age	hemorrhage	total brain vol	TBV^0.3	TBV^0.67	TBV/BW	right brain	left brain	diff R vs L	% difference R vs L	Hippocampus	Hippo/TBV*1000	Right Hippo	Left Left Hippo	diff R vs L Hippo	% difference Hippo	adhesion Sag	Sag ht to TBV*1000	Sag ht to TBV0.3	sag ht/BW	Sag ht/nTBV	Axial adhesion area	Area to TBV	Sag ht to TBV0.67*1000	Area to BW	Area to nTBV*10		Adhesion diameter			Adhesion perimeter
	2	1.3	yorkshire terrier	8	1	53672	37.7073	1422.87	412.862	27779.2	25892.8	1886.42	6.79076	253.98	4.73208	124.98	129	-4.02	-3.21651	3.03	5.6454	8.03559	23.3077	0.0733902	15.374	2.86444	10.8049	11.8262	0.372377		4.424	8.24266	0.310921	4.628	8.62275	12.2735
	2	6.2	Shih Tzu	8		40907.1	34.4439	1187.22	65.9792	20116.1	20791	-674.88	-3.35492	367.07	8.97326	149.13	217.94	-68.81	-46.141	5.75	14.0562	16.6938	9.27419	0.871487	28.286	6.91469	23.8253	4.56226	4.28711		6.001	14.6698	0.505465	6.138	15.0047	17.8203
	0	6.63		8	0	63749.5	39.933	1595.82	96.1531	31331.2	32418.3	-1087.13	-3.4698	555.18	8.70878	273.88	281.3	-7.42	-2.70922	4.44	6.96476	11.1186	6.69683	0.461764	40.126	6.29432	25.1444	6.05219	4.17314		7.148	11.2126	0.447919	7.225	11.3334	18.0928
	2	6.06	Shih Tzu	13		50483	36.9452	1365.94	83.3053	24637.8	39512.8	-14875	-60.3748	494.96	9.80448	222.68	272.28	-49.6	-22.2741	5.75	11.39	15.5636	9.48845	0.690232	30.926	6.12602	22.6409	5.1033	3.71237		6.275	12.4299	0.459392	6.301	12.4814	17.055
	2	25	mixed breed	14		76721.7	42.476	1805.56	30.6887	37556.2	32321.1	5235.08	13.9393	452.44	5.89716	208.79	243.65	-34.86	-16.6962	5.61	7.31214	13.2075	2.244	1.82803	37.888	4.93837	20.984	1.51552	12.3459		6.946	9.0535	0.3847	7.029	9.16168	16.5482
	2	6.9	pomeranian	11		59606.2	39.0485	1525.91	86.3857	28931.8	23291.3	5640.46	19.4957	494.18	8.29076	240.47	253.71	-13.24	-5.50588	5.99	10.0493	15.3399	8.68116	0.693402	42.198	7.07947	27.6544	6.11565	4.88483		7.33	12.2974	0.480371	7.469	12.5306	19.1275
	1	13	Beagle	17		58661.2	38.8411	1509.73	45.124	29409.2	29252	157.22	0.534595	617.36	10.5242	283.35	334.01	-50.66	-17.8789	3.39	5.77895	8.72787	2.60769	0.751264	12.521	2.13446	8.29351	0.963154	2.7748		3.993	6.80689	0.264484	4.423	7.53991	11.3874
	0	13.6	cocker sp	15		61067.2	39.3649	1550.74	44.9023	29936	31131.2	-1195.17	-3.99242	492.6	8.06653	263.58	229.02	34.56	13.1118	4.45	7.28706	11.3045	3.27206	0.99104	27.838	4.55859	17.9514	2.04691	6.19968		5.954	9.74992	0.383946	6.106	9.99883	15.5113
	2	6.4	shih tzu	13	6	42525	34.8921	1218.32	66.4453	21631.9	20893.1	738.84	3.41551	378.08	8.89077	190.58	187.5	3.08	1.61612	4.85	11.4051	13.9	7.57812	0.729924	23.328	5.48571	19.1476	3.645	3.51086		5.45	12.816	0.447336	5.669	13.331	16.2472
	2	18.6	mixed	14	19	78954	42.884	1840.42	42.4484	40306.3	38647.7	1658.6	4.11499	573.06	7.25815	298.81	274.25	24.56	8.21927	4.17	5.28156	9.72392	2.24194	0.982369	32.266	4.08668	17.5319	1.73473	7.60123		6.41	8.11865	0.348291	6.515	8.25164	15.1922
						56162.5				27137.2	29025.3	-1888.17	-6.95788							0.53					29.968						6.177			6.521
						84081				41987.2	42093.8	-106.6	-0.253887	366.59		66.45				6.58					40.013						7.138			7.254
						36100.1				17124.4	18975.7	-1851.28	-10.8108	259.78		118.36				5.22					31.484						6.331			6.546
